# Supplementary material
Source: Royal Society of Chemistry journal article supplement (doi:10.1039/d6dt00893c)
Supplement: d6dt00893c1.pdf [file d6dt00893c1.pdf]

## Supplementary Information

# Magnetization dynamics in a Dy based 2D coordination network bridged by a nitronyl nitroxide radical with a CN group

Chao-Yi Jin,<sup>a</sup> Honghui Li,<sup>a</sup> Yan Zhou,<sup>a</sup> Jinkui Tang,<sup>\*b</sup> Peng Cheng,<sup>a</sup> and Licun Li<sup>\*a</sup>

*a Department of Chemistry, Key Laboratory of Advanced Energy Materials Chemistry, College of Chemistry, Nankai University, Tianjin, China*

*b China School of Chemistry and Chemical Engineering, Beijing Institute of Technology, Beijing, P. R. China*

\* Corresponding authors:

Jinkui Tang (E-mail: jtang@bit.edu.cn)

Licun Li (E-mail: llicun@nankai.edu.cn);

|                                                                                                                                                                                                                                                                                      |     |
|--------------------------------------------------------------------------------------------------------------------------------------------------------------------------------------------------------------------------------------------------------------------------------------|-----|
| <b>Table S1.</b> Selected bond distances (Å) and angles (°) for complex <b>1</b> .....                                                                                                                                                                                               | S3  |
| <b>Table S2.</b> Selected bond distances (Å) and angles (°) for complex <b>2</b> .....                                                                                                                                                                                               | S6  |
| <b>Table S3.</b> Selected bond distances (Å) and angles (°) for complex <b>3</b> .....                                                                                                                                                                                               | S9  |
| <b>Table S4.</b> SHAPE analyses for complexes <b>1-3</b> .....                                                                                                                                                                                                                       | S12 |
| <b>Figure S1.</b> Powder X-ray diffraction patterns of complexes <b>1-3</b> .....                                                                                                                                                                                                    | S12 |
| <b>Figure S2.</b> Coordination polyhedrons of Ln(III) ions in complexes <b>1-3</b> .....                                                                                                                                                                                             | S13 |
| <b>Figure S3.</b> (a) The asymmetric unit of <b>1</b> (Fluorine and hydrogen atoms are omitted for clarity); (b) View of 2D coordination network of <b>1</b> .....                                                                                                                   | S14 |
| <b>Figure S4.</b> (a) The asymmetric unit of <b>2</b> (Fluorine and hydrogen atoms are omitted for clarity); (b) View of 2D coordination network of <b>2</b> .....                                                                                                                   | S15 |
| <b>Figure S5.</b> Packing patterns of 2D networks of complexes <b>1-3</b> .....                                                                                                                                                                                                      | S16 |
| <b>Figure S6.</b> (a) Magellan predicted magnetic axes for the Dy1, Dy6 and Dy5 centers in <b>3</b> ; (b) The orientations of magnetic axes and the coordination atoms in the first spheres of Dy1, Dy6 and Dy5 centers in <b>3</b> . (H and F atoms are omitted for clarity). ..... | S17 |
| <b>Figure S7.</b> <i>M</i> versus <i>H</i> plots for <b>2</b> and <b>3</b> at 2 K.....                                                                                                                                                                                               | S17 |
| <b>Figure S8.</b> Temperature dependence of the ac magnetic susceptibility for <b>2</b> under zero dc field (a) and a dc field of 2500Oe (b).....                                                                                                                                    | S18 |
| <b>Figure S9</b> Temperature dependences of in-phase ( $\chi'_M$ ) (a) and out-of-phase ( $\chi''_M$ ) (b) magnetic susceptibility for <b>3</b> in zero dc field with an oscillation of 3 Oe. ....                                                                                   | S18 |

**Table S1. Selected bond distances (Å) and angles (°) for complex 1.**

| Bond distances      |           |                    |           |
|---------------------|-----------|--------------------|-----------|
| Gd(1)-O(24)         | 2.342(7)  | Gd(2)-O(6)         | 2.376(7)  |
| Gd(1)-O(25)         | 2.325(7)  | Gd(2)-O(20)        | 2.353(8)  |
| Gd(1)-O(30)         | 2.335(7)  | Gd(2)-O(21)        | 2.330(7)  |
| Gd(1)-O(34)#3       | 2.363(7)  | Gd(2)-O(28)        | 2.325(6)  |
| Gd(1)-O(38)         | 2.335(8)  | Gd(2)-O(35)        | 2.332(8)  |
| Gd(1)-O(39)         | 2.320(8)  | Gd(2)-O(36)        | 2.346(8)  |
| Gd(1)-O(40)         | 2.343(8)  | Gd(2)-O(42)        | 2.331(7)  |
| Gd(1)-N(12)         | 2.541(10) | Gd(2)-N(9)#1       | 2.511(9)  |
| Gd(3)-O(2)          | 2.363(7)  | Gd(4)-O(1)         | 2.363(6)  |
| Gd(3)-O(4)          | 2.308(6)  | Gd(4)-O(11)        | 2.320(7)  |
| Gd(3)-O(7)          | 2.349(6)  | Gd(4)-O(12)        | 2.333(7)  |
| Gd(3)-O(9)          | 2.345(7)  | Gd(4)-O(14)        | 2.338(7)  |
| Gd(3)-O(13)         | 2.337(7)  | Gd(4)-O(19)        | 2.336(7)  |
| Gd(3)-O(16)         | 2.324(7)  | Gd(4)-O(26)        | 2.337(7)  |
| Gd(3)-O(22)         | 2.341(7)  | Gd(4)-O(41)        | 2.295(7)  |
| Gd(3)-O(23)         | 2.363(6)  | Gd(4)-N(8)         | 2.507(8)  |
| Gd(5)-O(5)          | 2.341(7)  | Gd(6)-O(3)         | 2.322(6)  |
| Gd(5)-O(10)#2       | 2.353(6)  | Gd(6)-O(8)         | 2.331(7)  |
| Gd(5)-O(27)         | 2.341(7)  | Gd(6)-O(15)        | 2.332(6)  |
| Gd(5)-O(29)         | 2.328(7)  | Gd(6)-O(17)        | 2.346(7)  |
| Gd(5)-O(31)         | 2.330(7)  | Gd(6)-O(18)        | 2.351(7)  |
| Gd(5)-O(32)         | 2.315(7)  | Gd(6)-O(1A)        | 2.341(6)  |
| Gd(5)-O(33)         | 2.330(7)  | Gd(6)-O(37)        | 2.351(7)  |
| Gd(5)-N(10)         | 2.483(9)  | Gd(6)-O(43)        | 2.323(7)  |
| O(1)-N(3)           | 1.306(10) | O(6)-N(1)          | 1.292(10) |
| O(7)-N(2)           | 1.279(9)  | O(10)-N(6)         | 1.313(10) |
| O(17)-N(4)          | 1.311(10) | O(1A)-N(7)         | 1.319(12) |
| O(23)-N(11)         | 1.283(10) | O(34)-N(5)         | 1.281(9)  |
| Angles              |           |                    |           |
| O(24)-Gd(1)-O(25)   | 73.4(3)   | O(6)-Gd(2)-N(9)#1  | 140.7(3)  |
| O(24)-Gd(1)-O(30)   | 141.1(2)  | O(20)-Gd(2)-O(6)   | 71.7(3)   |
| O(24)-Gd(1)-O(34)#3 | 73.1(3)   | O(20)-Gd(2)-N(9)#1 | 72.4(3)   |
| O(24)-Gd(1)-O(40)   | 79.7(3)   | O(21)-Gd(2)-O(6)   | 104.3(3)  |
| O(24)-Gd(1)-N(12)   | 143.0(3)  | O(21)-Gd(2)-O(20)  | 75.6(3)   |
| O(25)-Gd(1)-O(30)   | 143.4(3)  | O(21)-Gd(2)-O(35)  | 74.5(3)   |
| O(25)-Gd(1)-O(34)#3 | 107.9(3)  | O(21)-Gd(2)-O(36)  | 138.4(3)  |
| O(25)-Gd(1)-O(38)   | 75.6(3)   | O(21)-Gd(2)-O(42)  | 73.8(3)   |
| O(25)-Gd(1)-O(40)   | 74.6(3)   | O(21)-Gd(2)-N(9)#1 | 81.5(3)   |
| O(25)-Gd(1)-N(12)   | 79.7(3)   | O(28)-Gd(2)-O(6)   | 81.8(2)   |
| O(30)-Gd(1)-O(34)#3 | 80.6(3)   | O(28)-Gd(2)-O(20)  | 74.0(3)   |
| O(30)-Gd(1)-O(38)   | 73.2(3)   | O(28)-Gd(2)-O(21)  | 145.2(3)  |

|                     |          |                    |          |
|---------------------|----------|--------------------|----------|
| O(30)-Gd(1)-O(40)   | 115.6(3) | O(28)-Gd(2)-O(35)  | 116.0(3) |
| O(30)-Gd(1)-N(12)   | 72.9(3)  | O(28)-Gd(2)-O(36)  | 73.6(3)  |
| O(34)#3-Gd(1)-N(12) | 140.8(3) | O(28)-Gd(2)-O(42)  | 139.1(2) |
| O(38)-Gd(1)-O(24)   | 123.1(3) | O(28)-Gd(2)-N(9)#1 | 73.5(3)  |
| O(38)-Gd(1)-O(34)#3 | 72.8(3)  | O(35)-Gd(2)-O(6)   | 151.2(3) |
| O(38)-Gd(1)-O(40)   | 134.2(3) | O(35)-Gd(2)-O(20)  | 133.0(3) |
| O(38)-Gd(1)-N(12)   | 72.2(3)  | O(35)-Gd(2)-O(36)  | 72.1(3)  |
| O(39)-Gd(1)-O(24)   | 76.2(3)  | O(35)-Gd(2)-N(9)#1 | 68.0(3)  |
| O(39)-Gd(1)-O(25)   | 138.4(3) | O(36)-Gd(2)-O(6)   | 93.6(3)  |
| O(39)-Gd(1)-O(30)   | 75.3(3)  | O(36)-Gd(2)-O(20)  | 146.0(3) |
| O(39)-Gd(1)-O(34)#3 | 89.2(3)  | O(36)-Gd(2)-N(9)#1 | 107.6(3) |
| O(39)-Gd(1)-O(38)   | 145.8(3) | O(42)-Gd(2)-O(6)   | 73.4(2)  |
| O(39)-Gd(1)-O(40)   | 72.6(3)  | O(42)-Gd(2)-O(20)  | 125.3(3) |
| O(39)-Gd(1)-N(12)   | 110.7(3) | O(42)-Gd(2)-O(35)  | 78.8(3)  |
| O(40)-Gd(1)-O(34)#3 | 150.2(3) | O(42)-Gd(2)-O(36)  | 76.0(3)  |
| O(40)-Gd(1)-N(12)   | 68.9(3)  | O(42)-Gd(2)-N(9)#1 | 142.9(3) |
| O(2)-Gd(3)-O(23)    | 72.3(2)  | O(1)-Gd(4)-N(8)    | 143.0(3) |
| O(4)-Gd(3)-O(2)     | 73.5(3)  | O(11)-Gd(4)-O(1)   | 107.3(2) |
| O(4)-Gd(3)-O(7)     | 90.7(2)  | O(11)-Gd(4)-O(12)  | 74.8(3)  |
| O(4)-Gd(3)-O(9)     | 75.7(3)  | O(11)-Gd(4)-O(14)  | 143.5(2) |
| O(4)-Gd(3)-O(13)    | 73.3(2)  | O(11)-Gd(4)-O(19)  | 75.8(3)  |
| O(4)-Gd(3)-O(16)    | 139.6(2) | O(11)-Gd(4)-O(26)  | 73.7(3)  |
| O(4)-Gd(3)-O(22)    | 146.1(3) | O(11)-Gd(4)-N(8)   | 79.7(3)  |
| O(4)-Gd(3)-O(23)    | 104.9(2) | O(12)-Gd(4)-O(1)   | 148.2(3) |
| O(7)-Gd(3)-O(2)     | 73.1(2)  | O(12)-Gd(4)-O(14)  | 116.8(3) |
| O(7)-Gd(3)-O(23)    | 135.9(2) | O(12)-Gd(4)-O(19)  | 135.7(2) |
| O(9)-Gd(3)-O(2)     | 132.9(2) | O(12)-Gd(4)-O(26)  | 76.9(3)  |
| O(9)-Gd(3)-O(7)     | 72.4(2)  | O(12)-Gd(4)-N(8)   | 68.8(3)  |
| O(9)-Gd(3)-O(23)    | 151.1(3) | O(14)-Gd(4)-O(1)   | 81.0(2)  |
| O(13)-Gd(3)-O(2)    | 122.7(3) | O(14)-Gd(4)-N(8)   | 73.9(3)  |
| O(13)-Gd(3)-O(7)    | 150.8(2) | O(19)-Gd(4)-O(1)   | 72.9(2)  |
| O(13)-Gd(3)-O(9)    | 79.9(3)  | O(19)-Gd(4)-O(14)  | 72.9(2)  |
| O(13)-Gd(3)-O(22)   | 133.4(2) | O(19)-Gd(4)-O(26)  | 124.5(3) |
| O(13)-Gd(3)-O(23)   | 72.9(3)  | O(19)-Gd(4)-N(8)   | 73.9(3)  |
| O(16)-Gd(3)-O(2)    | 146.7(2) | O(26)-Gd(4)-O(1)   | 73.5(2)  |
| O(16)-Gd(3)-O(7)    | 103.4(2) | O(26)-Gd(4)-O(14)  | 141.0(2) |
| O(16)-Gd(3)-O(9)    | 73.0(2)  | O(26)-Gd(4)-N(8)   | 141.0(3) |
| O(16)-Gd(3)-O(13)   | 76.6(3)  | O(41)-Gd(4)-O(1)   | 89.5(3)  |
| O(16)-Gd(3)-O(22)   | 73.9(3)  | O(41)-Gd(4)-O(11)  | 140.8(3) |
| O(16)-Gd(3)-O(23)   | 91.0(2)  | O(41)-Gd(4)-O(12)  | 72.9(3)  |
| O(22)-Gd(3)-O(2)    | 73.5(2)  | O(41)-Gd(4)-O(14)  | 72.7(3)  |
| O(22)-Gd(3)-O(7)    | 72.1(2)  | O(41)-Gd(4)-O(19)  | 143.4(3) |
| O(22)-Gd(3)-O(9)    | 123.2(2) | O(41)-Gd(4)-O(26)  | 77.9(3)  |
| O(22)-Gd(3)-O(23)   | 72.4(2)  | O(41)-Gd(4)-N(8)   | 108.0(3) |

|                     |          |                    |          |
|---------------------|----------|--------------------|----------|
| O(5)-Gd(5)-O(10)#2  | 78.7(2)  | O(3)-Gd(6)-O(8)    | 139.7(2) |
| O(5)-Gd(5)-N(10)    | 74.2(3)  | O(3)-Gd(6)-O(15)   | 77.6(2)  |
| O(10)#2-Gd(5)-N(10) | 141.5(3) | O(3)-Gd(6)-O(17)   | 89.9(2)  |
| O(27)-Gd(5)-O(5)    | 120.3(3) | O(3)-Gd(6)-O(18)   | 72.9(2)  |
| O(27)-Gd(5)-O(10)#2 | 149.1(3) | O(3)-Gd(6)-O(1A)   | 103.3(2) |
| O(27)-Gd(5)-N(10)   | 69.4(3)  | O(3)-Gd(6)-O(37)   | 76.6(3)  |
| O(29)-Gd(5)-O(5)    | 146.0(3) | O(3)-Gd(6)-O(43)   | 149.3(2) |
| O(29)-Gd(5)-O(10)#2 | 106.0(2) | O(8)-Gd(6)-O(15)   | 72.7(2)  |
| O(29)-Gd(5)-O(27)   | 72.7(3)  | O(8)-Gd(6)-O(17)   | 106.5(2) |
| O(29)-Gd(5)-O(31)   | 75.9(3)  | O(8)-Gd(6)-O(18)   | 75.6(3)  |
| O(29)-Gd(5)-O(33)   | 73.8(3)  | O(8)-Gd(6)-O(1A)   | 90.1(3)  |
| O(29)-Gd(5)-N(10)   | 83.3(3)  | O(8)-Gd(6)-O(37)   | 143.3(3) |
| O(31)-Gd(5)-O(5)    | 73.5(2)  | O(15)-Gd(6)-O(17)  | 73.0(2)  |
| O(31)-Gd(5)-O(10)#2 | 72.5(3)  | O(15)-Gd(6)-O(18)  | 80.0(3)  |
| O(31)-Gd(5)-O(27)   | 133.7(3) | O(15)-Gd(6)-O(1A)  | 150.4(3) |
| O(31)-Gd(5)-O(33)   | 125.3(2) | O(15)-Gd(6)-O(37)  | 135.8(3) |
| O(31)-Gd(5)-N(10)   | 73.9(3)  | O(17)-Gd(6)-O(18)  | 150.5(3) |
| O(32)-Gd(5)-O(5)    | 72.1(3)  | O(17)-Gd(6)-O(37)  | 71.7(2)  |
| O(32)-Gd(5)-O(10)#2 | 93.9(3)  | O(18)-Gd(6)-O(37)  | 124.4(3) |
| O(32)-Gd(5)-O(27)   | 72.1(3)  | O(1A)-Gd(6)-O(17)  | 136.2(3) |
| O(32)-Gd(5)-O(29)   | 139.1(3) | O(1A)-Gd(6)-O(18)  | 72.3(3)  |
| O(32)-Gd(5)-O(31)   | 144.9(3) | O(1A)-Gd(6)-O(37)  | 71.1(3)  |
| O(32)-Gd(5)-O(33)   | 78.4(3)  | O(43)-Gd(6)-O(8)   | 70.9(3)  |
| O(32)-Gd(5)-N(10)   | 103.0(3) | O(43)-Gd(6)-O(15)  | 120.4(3) |
| O(33)-Gd(5)-O(5)    | 137.5(2) | O(43)-Gd(6)-O(17)  | 74.3(2)  |
| O(33)-Gd(5)-O(10)#2 | 73.5(3)  | O(43)-Gd(6)-O(18)  | 131.4(3) |
| O(33)-Gd(5)-O(27)   | 76.6(3)  | O(43)-Gd(6)-O(1A)  | 73.6(3)  |
| O(33)-Gd(5)-N(10)   | 143.4(3) | O(43)-Gd(6)-O(37)  | 73.5(3)  |
| N(3)-O(1)-Gd(4)     | 136.6(6) | N(1)-O(6)-Gd(2)    | 136.0(6) |
| N(2)-O(7)-Gd(3)     | 142.4(6) | N(6)-O(10)-Gd(5)#4 | 137.3(6) |
| N(4)-O(17)-Gd(6)    | 143.0(6) | N(7)-O(1A)-Gd(6)   | 142.9(7) |
| N(11)-O(23)-Gd(3)   | 140.6(6) | N(5)-O(34)-Gd(1)#5 | 139.8(6) |

Symmetry transformations used to generate equivalent atoms:

#1 x-1, y, z+1; #2 x-1, y, z; #3 x, y, z+1; #4 x+1, y, z; #5 x, y, z-1

**Table S2. Selected bond distances (Å) and angles (°) for complex 2.**

| Bond distances      |           |                    |           |
|---------------------|-----------|--------------------|-----------|
| Tb(1)-O(24)         | 2.369(9)  | Tb(2)-O(6)         | 2.388(9)  |
| Tb(1)-O(25)         | 2.359(10) | Tb(2)-O(20)        | 2.364(9)  |
| Tb(1)-O(30)         | 2.373(9)  | Tb(2)-O(21)        | 2.338(9)  |
| Tb(1)-O(34)#3       | 2.381(9)  | Tb(2)-O(28)        | 2.356(9)  |
| Tb(1)-O(38)         | 2.357(10) | Tb(2)-O(35)        | 2.362(11) |
| Tb(1)-O(39)         | 2.351(12) | Tb(2)-O(36)        | 2.370(10) |
| Tb(1)-O(40)         | 2.372(11) | Tb(2)-O(42)        | 2.370(9)  |
| Tb(1)-N(12)         | 2.550(12) | Tb(2)-N(9)#1       | 2.540(11) |
| Tb(3)-O(2)          | 2.375(10) | Tb(4)-O(1)         | 2.381(8)  |
| Tb(3)-O(4)          | 2.355(8)  | Tb(4)-O(11)        | 2.334(9)  |
| Tb(3)-O(7)          | 2.353(8)  | Tb(4)-O(12)        | 2.350(9)  |
| Tb(3)-O(9)          | 2.375(8)  | Tb(4)-O(14)        | 2.361(9)  |
| Tb(3)-O(13)         | 2.357(11) | Tb(4)-O(19)        | 2.355(9)  |
| Tb(3)-O(16)         | 2.356(9)  | Tb(4)-O(26)        | 2.360(9)  |
| Tb(3)-O(22)         | 2.373(9)  | Tb(4)-O(41)        | 2.323(9)  |
| Tb(3)-O(23)         | 2.384(8)  | Tb(4)-N(8)         | 2.541(12) |
| Tb(5)-O(5)          | 2.372(10) | Tb(6)-O(3)         | 2.355(8)  |
| Tb(5)-O(10)#2       | 2.380(8)  | Tb(6)-O(8)         | 2.358(9)  |
| Tb(5)-O(27)         | 2.367(10) | Tb(6)-O(15)        | 2.374(9)  |
| Tb(5)-O(29)         | 2.357(9)  | Tb(6)-O(17)        | 2.365(8)  |
| Tb(5)-O(31)         | 2.350(9)  | Tb(6)-O(18)        | 2.360(10) |
| Tb(5)-O(32)         | 2.343(9)  | Tb(6)-O(1A)        | 2.368(8)  |
| Tb(5)-O(33)         | 2.351(10) | Tb(6)-O(37)        | 2.372(9)  |
| Tb(5)-N(10)         | 2.526(13) | Tb(6)-O(43)        | 2.357(8)  |
| O(1)-N(3)           | 1.313(13) | O(6)-N(1)          | 1.326(12) |
| O(7)-N(2)           | 1.323(12) | O(10)-N(6)         | 1.284(13) |
| O(17)-N(4)          | 1.279(13) | O(1A)-N(7)         | 1.306(15) |
| O(23)-N(11)         | 1.310(14) | O(34)-N(5)         | 1.286(13) |
| Angles              |           |                    |           |
| O(24)-Tb(1)-O(30)   | 141.8(3)  | O(6)-Tb(2)-N(9)#1  | 140.5(3)  |
| O(24)-Tb(1)-O(34)#3 | 73.6(3)   | O(20)-Tb(2)-O(6)   | 71.4(3)   |
| O(24)-Tb(1)-O(40)   | 80.0(4)   | O(20)-Tb(2)-O(36)  | 145.6(3)  |
| O(24)-Tb(1)-N(12)   | 142.6(4)  | O(20)-Tb(2)-O(42)  | 125.2(3)  |
| O(25)-Tb(1)-O(24)   | 72.6(3)   | O(20)-Tb(2)-N(9)#1 | 72.4(4)   |
| O(25)-Tb(1)-O(30)   | 143.6(3)  | O(21)-Tb(2)-O(6)   | 104.8(3)  |
| O(25)-Tb(1)-O(34)#3 | 108.3(3)  | O(21)-Tb(2)-O(20)  | 76.9(3)   |
| O(25)-Tb(1)-O(40)   | 75.5(4)   | O(21)-Tb(2)-O(28)  | 145.3(3)  |
| O(25)-Tb(1)-N(12)   | 79.6(4)   | O(21)-Tb(2)-O(35)  | 74.8(4)   |
| O(30)-Tb(1)-O(34)#3 | 80.5(3)   | O(21)-Tb(2)-O(36)  | 137.5(3)  |
| O(30)-Tb(1)-O(38)   | 73.2(4)   | O(21)-Tb(2)-O(42)  | 73.3(3)   |
| O(30)-Tb(1)-N(12)   | 72.8(4)   | O(21)-Tb(2)-N(9)#1 | 81.7(4)   |

|                     |          |                    |          |
|---------------------|----------|--------------------|----------|
| O(34)#3-Tb(1)-N(12) | 140.4(4) | O(28)-Tb(2)-O(6)   | 81.4(3)  |
| O(38)-Tb(1)-O(24)   | 123.0(4) | O(28)-Tb(2)-O(20)  | 72.9(3)  |
| O(38)-Tb(1)-O(25)   | 76.0(4)  | O(28)-Tb(2)-O(35)  | 115.5(4) |
| O(38)-Tb(1)-O(30)   | 73.2(4)  | O(28)-Tb(2)-O(36)  | 74.4(3)  |
| O(38)-Tb(1)-O(34)#3 | 72.9(3)  | O(28)-Tb(2)-O(42)  | 139.4(3) |
| O(38)-Tb(1)-O(40)   | 134.6(4) | O(28)-Tb(2)-N(9)#1 | 73.3(3)  |
| O(38)-Tb(1)-N(12)   | 71.7(4)  | O(35)-Tb(2)-O(6)   | 151.6(3) |
| O(39)-Tb(1)-O(24)   | 76.1(4)  | O(35)-Tb(2)-O(20)  | 133.8(3) |
| O(39)-Tb(1)-O(25)   | 137.5(4) | O(35)-Tb(2)-O(36)  | 71.3(4)  |
| O(39)-Tb(1)-O(30)   | 75.9(4)  | O(35)-Tb(2)-O(42)  | 79.7(3)  |
| O(39)-Tb(1)-O(34)#3 | 89.2(4)  | O(35)-Tb(2)-N(9)#1 | 67.9(4)  |
| O(39)-Tb(1)-O(38)   | 146.3(4) | O(36)-Tb(2)-O(6)   | 93.6(3)  |
| O(39)-Tb(1)-O(40)   | 71.4(4)  | O(36)-Tb(2)-O(42)  | 76.0(3)  |
| O(39)-Tb(1)-N(12)   | 111.4(4) | O(36)-Tb(2)-N(9)#1 | 107.8(4) |
| O(40)-Tb(1)-O(30)   | 114.5(4) | O(42)-Tb(2)-O(6)   | 73.3(3)  |
| O(40)-Tb(1)-O(34)#3 | 150.4(3) | O(42)-Tb(2)-N(9)#1 | 143.3(4) |
| O(2)-Tb(3)-O(9)     | 133.4(3) | O(1)-Tb(4)-N(8)    | 143.5(3) |
| O(2)-Tb(3)-O(23)    | 72.3(3)  | O(11)-Tb(4)-O(1)   | 107.3(3) |
| O(4)-Tb(3)-O(2)     | 74.1(3)  | O(11)-Tb(4)-O(12)  | 75.1(3)  |
| O(4)-Tb(3)-O(9)     | 76.5(3)  | O(11)-Tb(4)-O(14)  | 143.9(3) |
| O(4)-Tb(3)-O(13)    | 72.4(3)  | O(11)-Tb(4)-O(19)  | 76.3(3)  |
| O(4)-Tb(3)-O(22)    | 145.9(3) | O(11)-Tb(4)-O(26)  | 73.0(3)  |
| O(4)-Tb(3)-O(23)    | 104.4(3) | O(11)-Tb(4)-N(8)   | 79.9(4)  |
| O(7)-Tb(3)-O(2)     | 72.3(3)  | O(12)-Tb(4)-O(1)   | 147.2(3) |
| O(7)-Tb(3)-O(4)     | 91.0(3)  | O(12)-Tb(4)-O(14)  | 116.5(3) |
| O(7)-Tb(3)-O(9)     | 72.9(3)  | O(12)-Tb(4)-O(19)  | 135.8(3) |
| O(7)-Tb(3)-O(13)    | 150.3(3) | O(12)-Tb(4)-O(26)  | 76.7(3)  |
| O(7)-Tb(3)-O(16)    | 103.1(3) | O(12)-Tb(4)-N(8)   | 69.2(4)  |
| O(7)-Tb(3)-O(22)    | 72.1(3)  | O(14)-Tb(4)-O(1)   | 81.4(3)  |
| O(7)-Tb(3)-O(23)    | 135.4(3) | O(14)-Tb(4)-O(26)  | 141.2(3) |
| O(9)-Tb(3)-O(23)    | 151.1(3) | O(14)-Tb(4)-N(8)   | 74.0(4)  |
| O(13)-Tb(3)-O(2)    | 123.4(3) | O(19)-Tb(4)-O(1)   | 74.0(3)  |
| O(13)-Tb(3)-O(7)    | 150.8(3) | O(19)-Tb(4)-O(14)  | 72.7(3)  |
| O(13)-Tb(3)-O(9)    | 79.3(3)  | O(19)-Tb(4)-O(26)  | 124.9(3) |
| O(13)-Tb(3)-O(22)   | 134.1(3) | O(19)-Tb(4)-N(8)   | 73.2(3)  |
| O(13)-Tb(3)-O(23)   | 73.7(3)  | O(26)-Tb(4)-O(1)   | 73.1(3)  |
| O(16)-Tb(3)-O(2)    | 146.1(3) | O(26)-Tb(4)-N(8)   | 140.8(3) |
| O(16)-Tb(3)-O(4)    | 139.7(3) | O(41)-Tb(4)-O(1)   | 89.6(3)  |
| O(16)-Tb(3)-O(7)    | 103.4(3) | O(41)-Tb(4)-O(11)  | 140.7(3) |
| O(16)-Tb(3)-O(9)    | 72.1(3)  | O(41)-Tb(4)-O(12)  | 72.1(3)  |
| O(16)-Tb(3)-O(13)   | 77.4(3)  | O(41)-Tb(4)-O(14)  | 72.2(3)  |
| O(16)-Tb(3)-O(22)   | 74.1(3)  | O(41)-Tb(4)-O(19)  | 143.1(3) |
| O(16)-Tb(3)-O(23)   | 91.7(3)  | O(41)-Tb(4)-O(26)  | 78.8(3)  |
| O(22)-Tb(3)-O(2)    | 72.6(3)  | O(41)-Tb(4)-N(8)   | 107.5(4) |

|                     |          |                    |          |
|---------------------|----------|--------------------|----------|
| O(22)-Tb(3)-O(7)    | 72.1(3)  | N(3)-O(1)-Tb(4)    | 137.8(7) |
| O(22)-Tb(3)-O(9)    | 123.3(3) | N(2)-O(7)-Tb(3)    | 142.8(7) |
| O(22)-Tb(3)-O(23)   | 72.0(3)  | N(1)-O(6)-Tb(2)    | 135.7(7) |
| O(5)-Tb(5)-O(10)#2  | 78.9(3)  | O(3)-Tb(6)-O(8)    | 139.8(3) |
| O(5)-Tb(5)-N(10)    | 74.1(4)  | O(3)-Tb(6)-O(15)   | 78.0(3)  |
| O(10)#2-Tb(5)-N(10) | 142.1(4) | O(3)-Tb(6)-O(17)   | 89.7(3)  |
| O(27)-Tb(5)-O(5)    | 120.3(3) | O(3)-Tb(6)-O(18)   | 72.3(3)  |
| O(27)-Tb(5)-O(10)#2 | 148.9(3) | O(3)-Tb(6)-O(1A)   | 103.3(3) |
| O(27)-Tb(5)-N(10)   | 69.0(4)  | O(3)-Tb(6)-O(37)   | 76.6(3)  |
| O(29)-Tb(5)-O(5)    | 145.9(3) | O(3)-Tb(6)-O(43)   | 148.3(3) |
| O(29)-Tb(5)-O(10)#2 | 106.1(3) | O(8)-Tb(6)-O(15)   | 72.3(3)  |
| O(29)-Tb(5)-O(27)   | 72.5(3)  | O(8)-Tb(6)-O(17)   | 106.5(3) |
| O(29)-Tb(5)-O(31)   | 75.9(3)  | O(8)-Tb(6)-O(18)   | 76.1(3)  |
| O(29)-Tb(5)-O(33)   | 73.8(3)  | O(8)-Tb(6)-O(1A)   | 89.8(3)  |
| O(29)-Tb(5)-N(10)   | 83.4(4)  | O(8)-Tb(6)-O(37)   | 143.1(3) |
| O(31)-Tb(5)-O(5)    | 73.0(3)  | O(8)-Tb(6)-O(43)   | 71.8(3)  |
| O(31)-Tb(5)-O(10)#2 | 73.4(3)  | O(17)-Tb(6)-O(15)  | 72.9(3)  |
| O(31)-Tb(5)-O(27)   | 133.1(3) | O(17)-Tb(6)-O(1A)  | 136.9(3) |
| O(31)-Tb(5)-O(29)   | 76.2(3)  | O(17)-Tb(6)-O(37)  | 72.0(3)  |
| O(31)-Tb(5)-O(33)   | 125.3(3) | O(18)-Tb(6)-O(15)  | 79.6(3)  |
| O(31)-Tb(5)-N(10)   | 73.5(3)  | O(18)-Tb(6)-O(17)  | 149.8(3) |
| O(32)-Tb(5)-O(5)    | 73.1(3)  | O(18)-Tb(6)-O(1A)  | 72.3(4)  |
| O(32)-Tb(5)-O(10)#2 | 94.2(3)  | O(18)-Tb(6)-O(37)  | 124.2(3) |
| O(32)-Tb(5)-O(27)   | 71.5(3)  | O(1A)-Tb(6)-O(15)  | 149.7(4) |
| O(32)-Tb(5)-O(29)   | 138.1(3) | O(1A)-Tb(6)-O(37)  | 71.4(4)  |
| O(32)-Tb(5)-O(31)   | 145.6(4) | O(37)-Tb(6)-O(15)  | 136.4(3) |
| O(32)-Tb(5)-O(33)   | 78.3(3)  | O(43)-Tb(6)-O(15)  | 121.0(3) |
| O(32)-Tb(5)-N(10)   | 102.8(4) | O(43)-Tb(6)-O(17)  | 74.5(3)  |
| O(33)-Tb(5)-O(5)    | 137.8(3) | O(43)-Tb(6)-O(18)  | 132.3(3) |
| O(33)-Tb(5)-O(10)#2 | 73.0(3)  | O(43)-Tb(6)-O(1A)  | 73.3(3)  |
| O(33)-Tb(5)-O(27)   | 77.1(3)  | O(43)-Tb(6)-O(37)  | 72.5(3)  |
| O(33)-Tb(5)-O(29)   | 73.5(3)  | N(6)-O(10)-Tb(5)#4 | 137.5(8) |

Symmetry transformations used to generate equivalent atoms:

#1 x-1, y, z+1; #2 x-1, y, z; #3 x, y, z+1; #4 x+1, y, z; #5 x, y, z-1

**Table S3. Selected bond distances (Å) and angles (°) for complex 3.**

| Bond distances      |           |                    |           |
|---------------------|-----------|--------------------|-----------|
| Dy(1)-O(24)         | 2.375(9)  | Dy(2)-O(6)         | 2.389(9)  |
| Dy(1)-O(25)         | 2.361(10) | Dy(2)-O(20)        | 2.368(10) |
| Dy(1)-O(30)         | 2.374(9)  | Dy(2)-O(21)        | 2.342(9)  |
| Dy(1)-O(34)#3       | 2.377(9)  | Dy(2)-O(28)        | 2.364(9)  |
| Dy(1)-O(38)         | 2.362(10) | Dy(2)-O(35)        | 2.368(11) |
| Dy(1)-O(39)         | 2.352(12) | Dy(2)-O(36)        | 2.371(10) |
| Dy(1)-O(40)         | 2.375(11) | Dy(2)-O(42)        | 2.372(9)  |
| Dy(1)-N(12)         | 2.551(12) | Dy(2)-N(9)#1       | 2.544(10) |
| Dy(3)-O(2)          | 2.377(10) | Dy(4)-O(1)         | 2.381(8)  |
| Dy(3)-O(4)          | 2.355(9)  | Dy(4)-O(11)        | 2.338(9)  |
| Dy(3)-O(7)          | 2.353(8)  | Dy(4)-O(12)        | 2.355(9)  |
| Dy(3)-O(9)          | 2.377(8)  | Dy(4)-O(14)        | 2.360(10) |
| Dy(3)-O(13)         | 2.356(10) | Dy(4)-O(19)        | 2.360(9)  |
| Dy(3)-O(16)         | 2.352(9)  | Dy(4)-O(26)        | 2.364(9)  |
| Dy(3)-O(22)         | 2.380(9)  | Dy(4)-O(41)        | 2.329(9)  |
| Dy(3)-O(23)         | 2.387(8)  | Dy(4)-N(8)         | 2.549(11) |
| Dy(5)-O(5)          | 2.376(10) | Dy(6)-O(3)         | 2.354(8)  |
| Dy(5)-O(10)#2       | 2.381(8)  | Dy(6)-O(8)         | 2.362(9)  |
| Dy(5)-O(27)         | 2.375(10) | Dy(6)-O(15)        | 2.380(8)  |
| Dy(5)-O(29)         | 2.359(10) | Dy(6)-O(17)        | 2.366(8)  |
| Dy(5)-O(31)         | 2.355(9)  | Dy(6)-O(18)        | 2.365(10) |
| Dy(5)-O(32)         | 2.344(9)  | Dy(6)-O(1A)        | 2.374(8)  |
| Dy(5)-O(33)         | 2.354(10) | Dy(6)-O(37)        | 2.379(9)  |
| Dy(5)-N(10)         | 2.522(12) | Dy(6)-O(43)        | 2.357(8)  |
| O(1)-N(3)           | 1.322(13) | O(6)-N(1)          | 1.326(12) |
| O(7)-N(2)           | 1.326(12) | O(10)-N(6)         | 1.284(13) |
| O(17)-N(4)          | 1.282(13) | O(1A)-N(7)         | 1.307(15) |
| O(23)-N(11)         | 1.310(14) | O(34)-N(5)         | 1.290(13) |
| Angles              |           |                    |           |
| O(24)-Dy(1)-O(34)#3 | 73.6(3)   | O(6)-Dy(2)-N(9)#1  | 140.4(3)  |
| O(24)-Dy(1)-N(12)   | 142.7(4)  | O(20)-Dy(2)-O(6)   | 71.4(3)   |
| O(25)-Dy(1)-O(24)   | 72.6(4)   | O(20)-Dy(2)-O(36)  | 145.7(3)  |
| O(25)-Dy(1)-O(30)   | 143.7(3)  | O(20)-Dy(2)-O(42)  | 125.5(3)  |
| O(25)-Dy(1)-O(34)#3 | 108.2(3)  | O(20)-Dy(2)-N(9)#1 | 72.4(4)   |
| O(25)-Dy(1)-O(38)   | 75.9(4)   | O(21)-Dy(2)-O(6)   | 104.7(3)  |
| O(25)-Dy(1)-O(40)   | 75.5(4)   | O(21)-Dy(2)-O(20)  | 77.0(3)   |
| O(25)-Dy(1)-N(12)   | 79.7(4)   | O(21)-Dy(2)-O(28)  | 145.4(3)  |
| O(30)-Dy(1)-O(24)   | 141.8(3)  | O(21)-Dy(2)-O(35)  | 75.0(4)   |
| O(30)-Dy(1)-O(34)#3 | 80.5(3)   | O(21)-Dy(2)-O(36)  | 137.3(3)  |
| O(30)-Dy(1)-O(40)   | 114.6(4)  | O(21)-Dy(2)-O(42)  | 73.3(3)   |
| O(30)-Dy(1)-N(12)   | 72.7(4)   | O(21)-Dy(2)-N(9)#1 | 81.9(4)   |

|                     |          |                    |          |
|---------------------|----------|--------------------|----------|
| O(34)#3-Dy(1)-N(12) | 140.3(4) | O(28)-Dy(2)-O(6)   | 81.3(3)  |
| O(38)-Dy(1)-O(24)   | 123.0(4) | O(28)-Dy(2)-O(20)  | 72.8(3)  |
| O(38)-Dy(1)-O(30)   | 73.3(4)  | O(28)-Dy(2)-O(35)  | 115.5(4) |
| O(38)-Dy(1)-O(34)#3 | 72.9(3)  | O(28)-Dy(2)-O(36)  | 74.6(3)  |
| O(38)-Dy(1)-O(40)   | 134.6(4) | O(28)-Dy(2)-O(42)  | 139.3(3) |
| O(38)-Dy(1)-N(12)   | 71.6(4)  | O(28)-Dy(2)-N(9)#1 | 73.3(3)  |
| O(39)-Dy(1)-O(24)   | 76.1(4)  | O(35)-Dy(2)-O(6)   | 151.6(3) |
| O(39)-Dy(1)-O(25)   | 137.5(4) | O(35)-Dy(2)-O(20)  | 133.8(3) |
| O(39)-Dy(1)-O(30)   | 75.9(4)  | O(35)-Dy(2)-O(36)  | 71.1(4)  |
| O(39)-Dy(1)-O(34)#3 | 89.2(4)  | O(35)-Dy(2)-O(42)  | 79.5(3)  |
| O(39)-Dy(1)-O(38)   | 146.4(4) | O(35)-Dy(2)-N(9)#1 | 67.9(4)  |
| O(39)-Dy(1)-O(40)   | 71.3(4)  | O(36)-Dy(2)-O(6)   | 93.7(3)  |
| O(39)-Dy(1)-N(12)   | 111.3(4) | O(36)-Dy(2)-O(42)  | 75.7(3)  |
| O(40)-Dy(1)-O(24)   | 79.8(4)  | O(36)-Dy(2)-N(9)#1 | 107.8(4) |
| O(40)-Dy(1)-O(34)#3 | 150.3(3) | O(42)-Dy(2)-O(6)   | 73.5(3)  |
| O(40)-Dy(1)-N(12)   | 69.2(4)  | O(42)-Dy(2)-N(9)#1 | 143.2(4) |
| N(5)-O(34)-Dy(1)#5  | 138.9(8) | N(1)-O(6)-Dy(2)    | 135.6(7) |
| O(2)-Dy(3)-O(22)    | 72.6(3)  | O(1)-Dy(4)-N(8)    | 143.5(3) |
| O(2)-Dy(3)-O(23)    | 72.3(3)  | O(11)-Dy(4)-O(1)   | 107.3(3) |
| O(4)-Dy(3)-O(2)     | 74.0(3)  | O(11)-Dy(4)-O(12)  | 75.3(3)  |
| O(4)-Dy(3)-O(9)     | 76.5(3)  | O(11)-Dy(4)-O(14)  | 143.7(3) |
| O(4)-Dy(3)-O(13)    | 72.4(3)  | O(11)-Dy(4)-O(19)  | 76.1(3)  |
| O(4)-Dy(3)-O(22)    | 145.8(3) | O(11)-Dy(4)-O(26)  | 73.0(3)  |
| O(4)-Dy(3)-O(23)    | 104.4(3) | O(11)-Dy(4)-N(8)   | 80.0(4)  |
| O(7)-Dy(3)-O(2)     | 72.4(3)  | O(12)-Dy(4)-O(1)   | 147.3(3) |
| O(7)-Dy(3)-O(4)     | 91.0(3)  | O(12)-Dy(4)-O(14)  | 116.4(3) |
| O(7)-Dy(3)-O(9)     | 72.8(3)  | O(12)-Dy(4)-O(19)  | 135.9(3) |
| O(7)-Dy(3)-O(13)    | 150.3(3) | O(12)-Dy(4)-O(26)  | 76.7(3)  |
| O(7)-Dy(3)-O(22)    | 72.2(3)  | O(12)-Dy(4)-N(8)   | 69.1(4)  |
| O(7)-Dy(3)-O(23)    | 135.4(3) | O(14)-Dy(4)-O(1)   | 81.4(3)  |
| O(9)-Dy(3)-O(2)     | 133.3(3) | O(14)-Dy(4)-O(26)  | 141.5(3) |
| O(9)-Dy(3)-O(22)    | 123.4(3) | O(14)-Dy(4)-N(8)   | 73.8(4)  |
| O(9)-Dy(3)-O(23)    | 151.1(3) | O(19)-Dy(4)-O(1)   | 74.0(3)  |
| O(13)-Dy(3)-O(2)    | 123.3(3) | O(19)-Dy(4)-O(14)  | 72.7(3)  |
| O(13)-Dy(3)-O(9)    | 79.4(3)  | O(19)-Dy(4)-O(26)  | 124.8(3) |
| O(13)-Dy(3)-O(22)   | 134.1(3) | O(19)-Dy(4)-N(8)   | 73.3(3)  |
| O(13)-Dy(3)-O(23)   | 73.7(3)  | O(26)-Dy(4)-O(1)   | 73.3(3)  |
| O(16)-Dy(3)-O(2)    | 146.3(3) | O(26)-Dy(4)-N(8)   | 140.7(3) |
| O(16)-Dy(3)-O(4)    | 139.6(3) | O(41)-Dy(4)-O(1)   | 89.7(3)  |
| O(16)-Dy(3)-O(7)    | 103.2(3) | O(41)-Dy(4)-O(11)  | 140.6(3) |
| O(16)-Dy(3)-O(9)    | 72.2(3)  | O(41)-Dy(4)-O(12)  | 71.8(3)  |
| O(16)-Dy(3)-O(13)   | 77.2(3)  | O(41)-Dy(4)-O(14)  | 72.5(3)  |
| O(16)-Dy(3)-O(22)   | 74.3(3)  | O(41)-Dy(4)-O(19)  | 143.3(3) |
| O(16)-Dy(3)-O(23)   | 91.6(3)  | O(41)-Dy(4)-O(26)  | 78.8(3)  |

|                     |          |                    |          |
|---------------------|----------|--------------------|----------|
| O(22)-Dy(3)-O(23)   | 72.0(3)  | O(41)-Dy(4)-N(8)   | 107.3(4) |
| N(2)-O(7)-Dy(3)     | 143.0(7) | N(3)-O(1)-Dy(4)    | 137.7(7) |
| N(11)-O(23)-Dy(3)   | 139.3(8) | N(7)-O(1A)-Dy(6)   | 143.0(9) |
| O(5)-Dy(5)-O(10)#2  | 78.9(3)  | O(3)-Dy(6)-O(8)    | 139.6(3) |
| O(5)-Dy(5)-N(10)    | 74.1(4)  | O(3)-Dy(6)-O(15)   | 77.9(3)  |
| O(10)#2-Dy(5)-N(10) | 142.1(4) | O(3)-Dy(6)-O(17)   | 89.5(3)  |
| O(27)-Dy(5)-O(5)    | 120.4(3) | O(3)-Dy(6)-O(18)   | 72.4(3)  |
| O(27)-Dy(5)-O(10)#2 | 149.0(3) | O(3)-Dy(6)-O(1A)   | 103.5(3) |
| O(27)-Dy(5)-N(10)   | 68.9(4)  | O(3)-Dy(6)-O(37)   | 76.6(3)  |
| O(29)-Dy(5)-O(5)    | 145.9(3) | O(3)-Dy(6)-O(43)   | 148.3(3) |
| O(29)-Dy(5)-O(10)#2 | 106.0(3) | O(8)-Dy(6)-O(15)   | 72.2(3)  |
| O(29)-Dy(5)-O(27)   | 72.5(3)  | O(8)-Dy(6)-O(17)   | 106.4(3) |
| O(29)-Dy(5)-N(10)   | 83.6(4)  | O(8)-Dy(6)-O(18)   | 76.0(3)  |
| O(31)-Dy(5)-O(5)    | 73.0(3)  | O(8)-Dy(6)-O(1A)   | 89.9(3)  |
| O(31)-Dy(5)-O(10)#2 | 73.4(3)  | O(8)-Dy(6)-O(37)   | 143.3(3) |
| O(31)-Dy(5)-O(27)   | 133.0(3) | O(15)-Dy(6)-O(17)  | 73.0(3)  |
| O(31)-Dy(5)-O(29)   | 76.1(4)  | O(15)-Dy(6)-O(18)  | 79.6(3)  |
| O(31)-Dy(5)-N(10)   | 73.6(3)  | O(15)-Dy(6)-O(1A)  | 149.7(4) |
| O(32)-Dy(5)-O(5)    | 73.1(3)  | O(15)-Dy(6)-O(37)  | 136.4(3) |
| O(32)-Dy(5)-O(10)#2 | 94.4(3)  | O(17)-Dy(6)-O(18)  | 149.8(3) |
| O(32)-Dy(5)-O(27)   | 71.4(3)  | O(17)-Dy(6)-O(1A)  | 136.8(3) |
| O(32)-Dy(5)-O(29)   | 138.1(3) | O(17)-Dy(6)-O(37)  | 72.1(3)  |
| O(32)-Dy(5)-O(31)   | 145.6(4) | O(18)-Dy(6)-O(1A)  | 72.3(4)  |
| O(32)-Dy(5)-O(33)   | 78.4(3)  | O(18)-Dy(6)-O(37)  | 124.2(3) |
| O(32)-Dy(5)-N(10)   | 102.5(4) | O(1A)-Dy(6)-O(37)  | 71.4(3)  |
| O(33)-Dy(5)-O(5)    | 138.0(3) | O(43)-Dy(6)-O(8)   | 71.9(3)  |
| O(33)-Dy(5)-O(10)#2 | 73.1(3)  | O(43)-Dy(6)-O(15)  | 121.1(3) |
| O(33)-Dy(5)-O(27)   | 77.0(4)  | O(43)-Dy(6)-O(17)  | 74.5(3)  |
| O(33)-Dy(5)-O(29)   | 73.3(3)  | O(43)-Dy(6)-O(18)  | 132.3(3) |
| O(33)-Dy(5)-O(31)   | 125.4(3) | O(43)-Dy(6)-O(1A)  | 73.2(3)  |
| O(33)-Dy(5)-N(10)   | 143.3(4) | O(43)-Dy(6)-O(37)  | 72.5(3)  |
| N(6)-O(10)-Dy(5)#4  | 137.8(8) | N(4)-O(17)-Dy(6)   | 143.4(8) |
| N(2)-O(7)-Dy(3)     | 143.0(7) | N(6)-O(10)-Dy(5)#4 | 137.8(8) |
| N(4)-O(17)-Dy(6)    | 143.4(8) | N(7)-O(1A)-Dy(6)   | 143.0(9) |
| N(11)-O(23)-Dy(3)   | 139.3(8) | N(5)-O(34)-Dy(1)#5 | 138.9(8) |

Symmetry transformations used to generate equivalent atoms:

#1 x-1, y, z+1; #2 x-1, y, z; #3 x, y, z+1; #4 x+1, y, z; #5 x, y, z-1

**Table S4.** SHAPE analyses for complexes **1–3**.

| Complex 1 | Gd1          | Gd2          | Gd3          | Gd4          | Gd5          | Gd6          |
|-----------|--------------|--------------|--------------|--------------|--------------|--------------|
| SAPR-8    | <b>0.620</b> | 1.025        | 1.335        | <b>0.667</b> | 1.252        | 1.115        |
| TDD-8     | 1.411        | <b>1.005</b> | <b>0.417</b> | 1.271        | <b>0.563</b> | <b>0.676</b> |
| BTPR-8    | 1.770        | 1.806        | 2.096        | 1.762        | 1.974        | 2.028        |
| Complex 2 | Tb1          | Tb2          | Tb3          | Tb4          | Tb5          | Tb 6         |
| SAPR-8    | <b>0.634</b> | 1.054        | 1.387        | <b>0.621</b> | 1.226        | 1.136        |
| TDD-8     | 1.423        | <b>1.004</b> | <b>0.458</b> | 1.254        | <b>0.554</b> | <b>0.658</b> |
| BTPR-8    | 1.752        | 1.854        | 2.069        | 1.736        | 1.997        | 2.057        |
| Complex 3 | Dy1          | Dy2          | Dy3          | Dy4          | Dy5          | Dy6          |
| SAPR-8    | <b>0.639</b> | 1.035        | 1.353        | <b>0.684</b> | 1.251        | 1.153        |
| TDD-8     | 1.478        | <b>1.005</b> | <b>0.423</b> | 1.235        | <b>0.532</b> | <b>0.673</b> |
| BTPR-8    | 1.758        | 1.824        | 2.013        | 1.773        | 1.942        | 2.027        |

SAPR-8: Square antiprism ( $D_{4d}$ ); TDD-8: Triangular dodecahedron ( $D_{2d}$ ); BTPR-8: Biaugmented trigonal ( $C_{2v}$ )

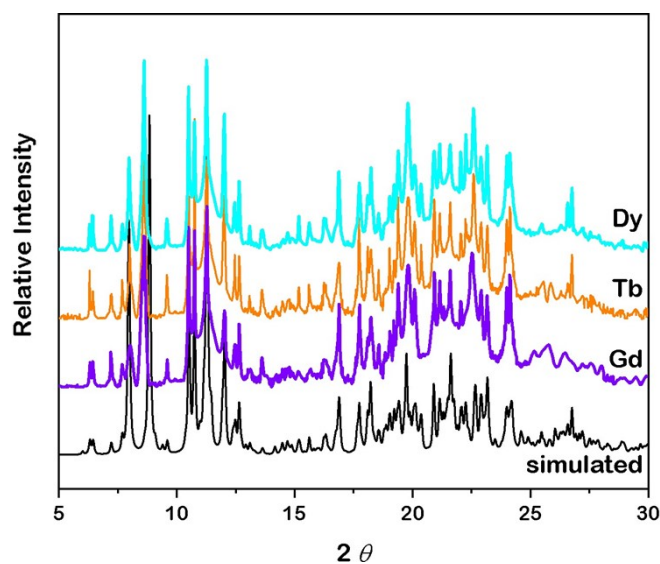**Figure S1.** Powder X-ray diffraction patterns of complexes **1-3**.

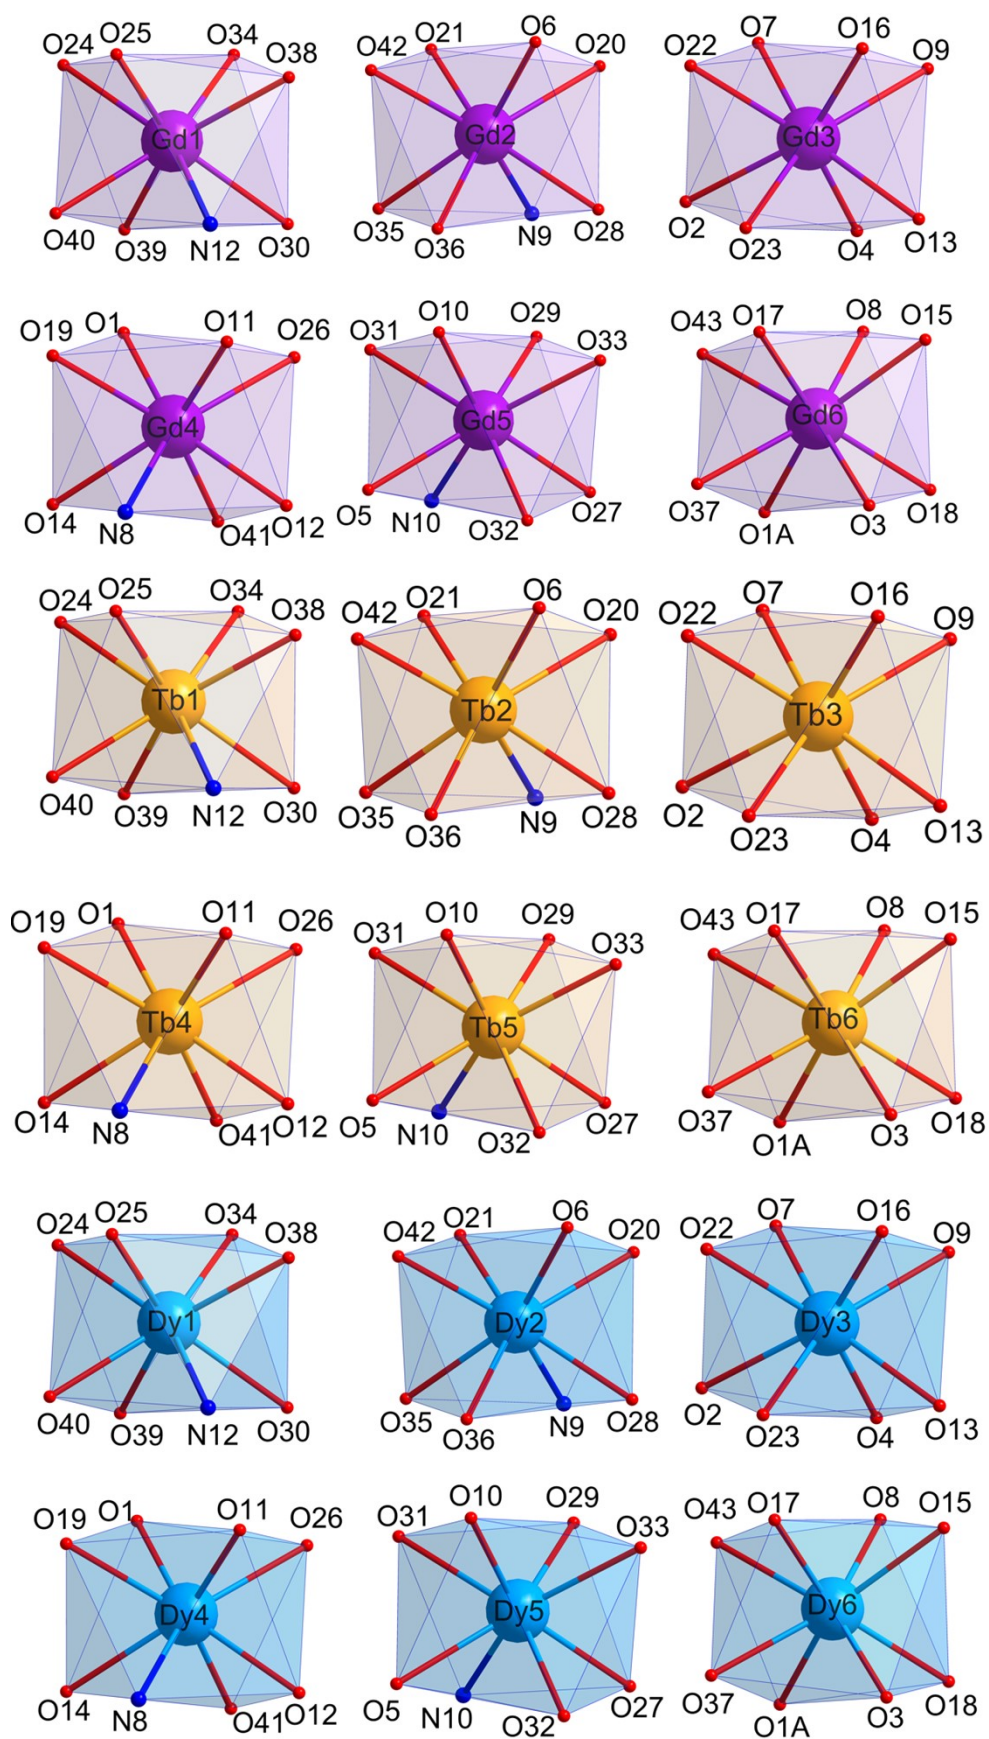

**Figure S2.** Coordination polyhedrons of Ln(III) ions in complexes 1-3.

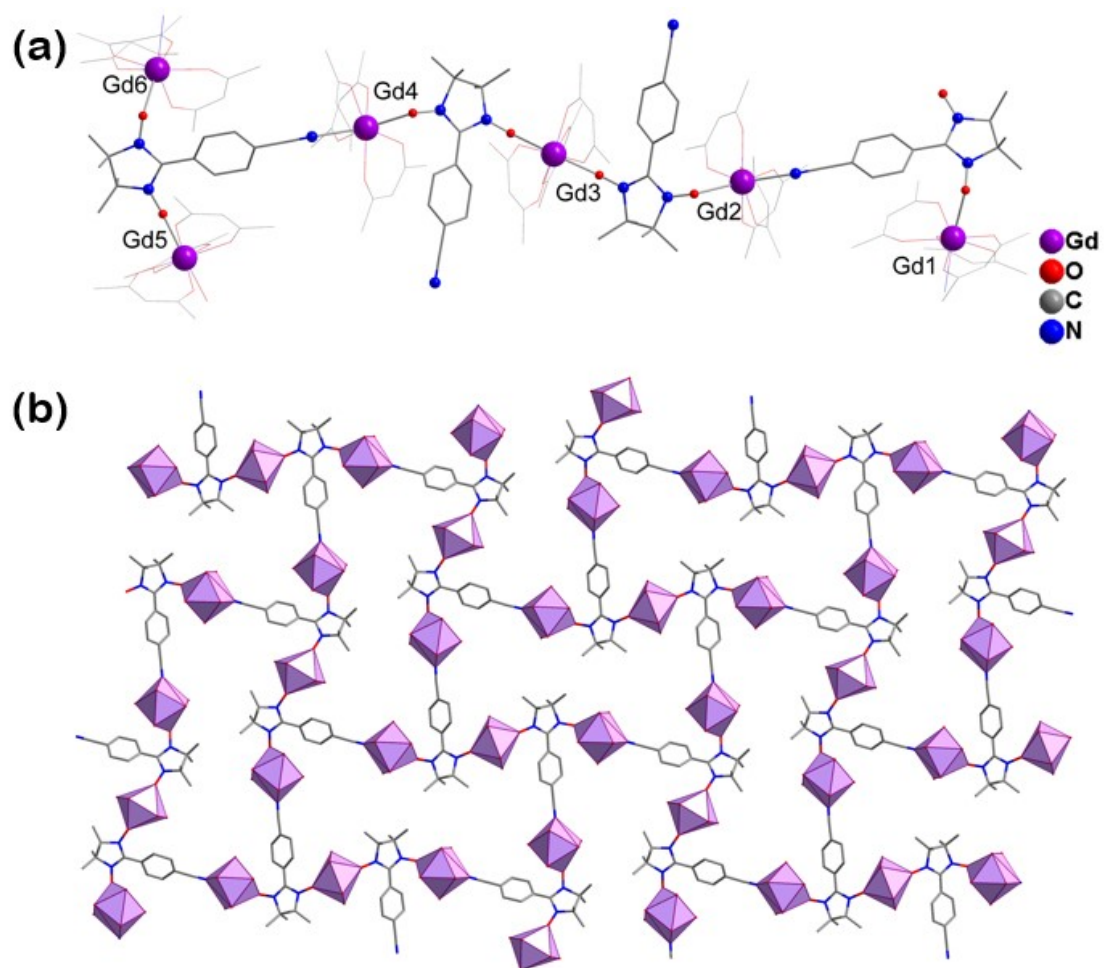

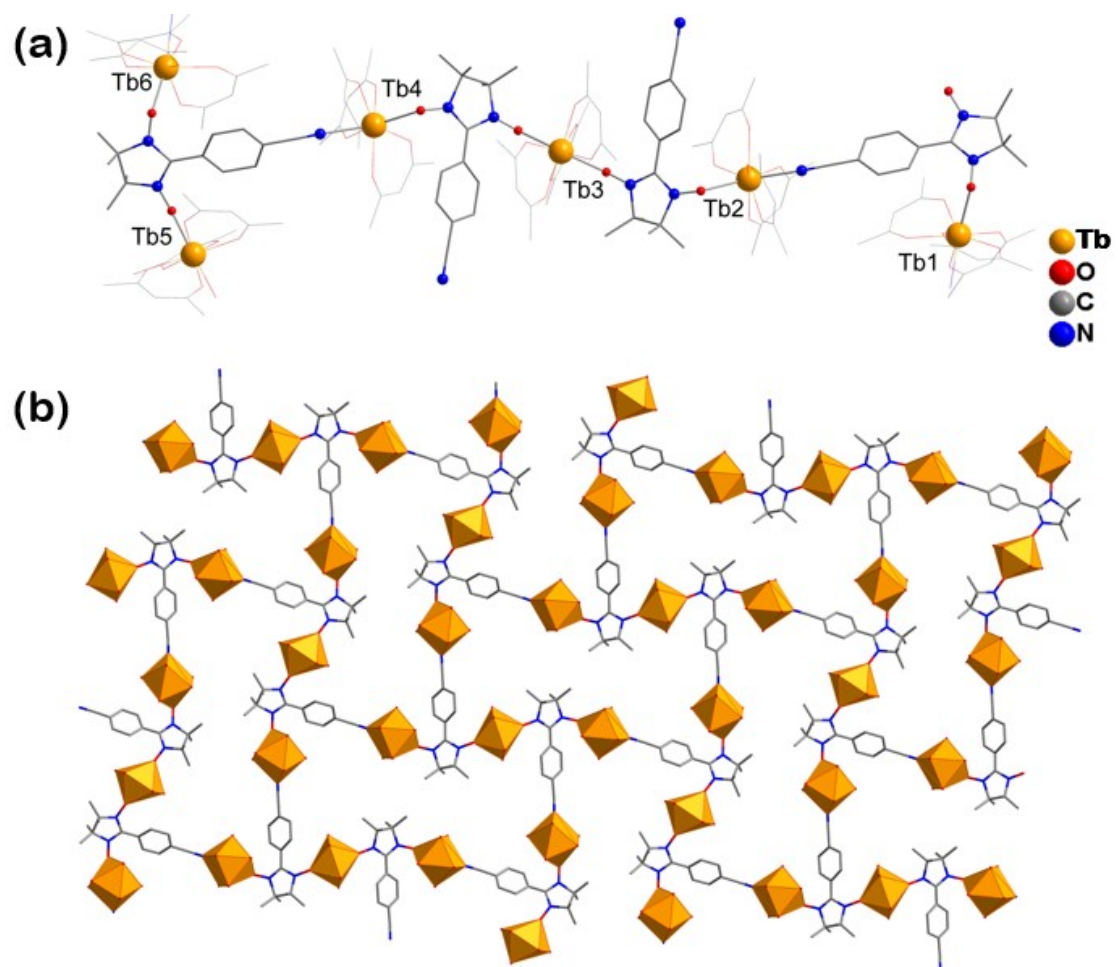

**Figure S4.** (a) The asymmetric unit of **2** (Fluorine and hydrogen atoms are omitted for clarity); (b) View of 2D coordination network of **2**.

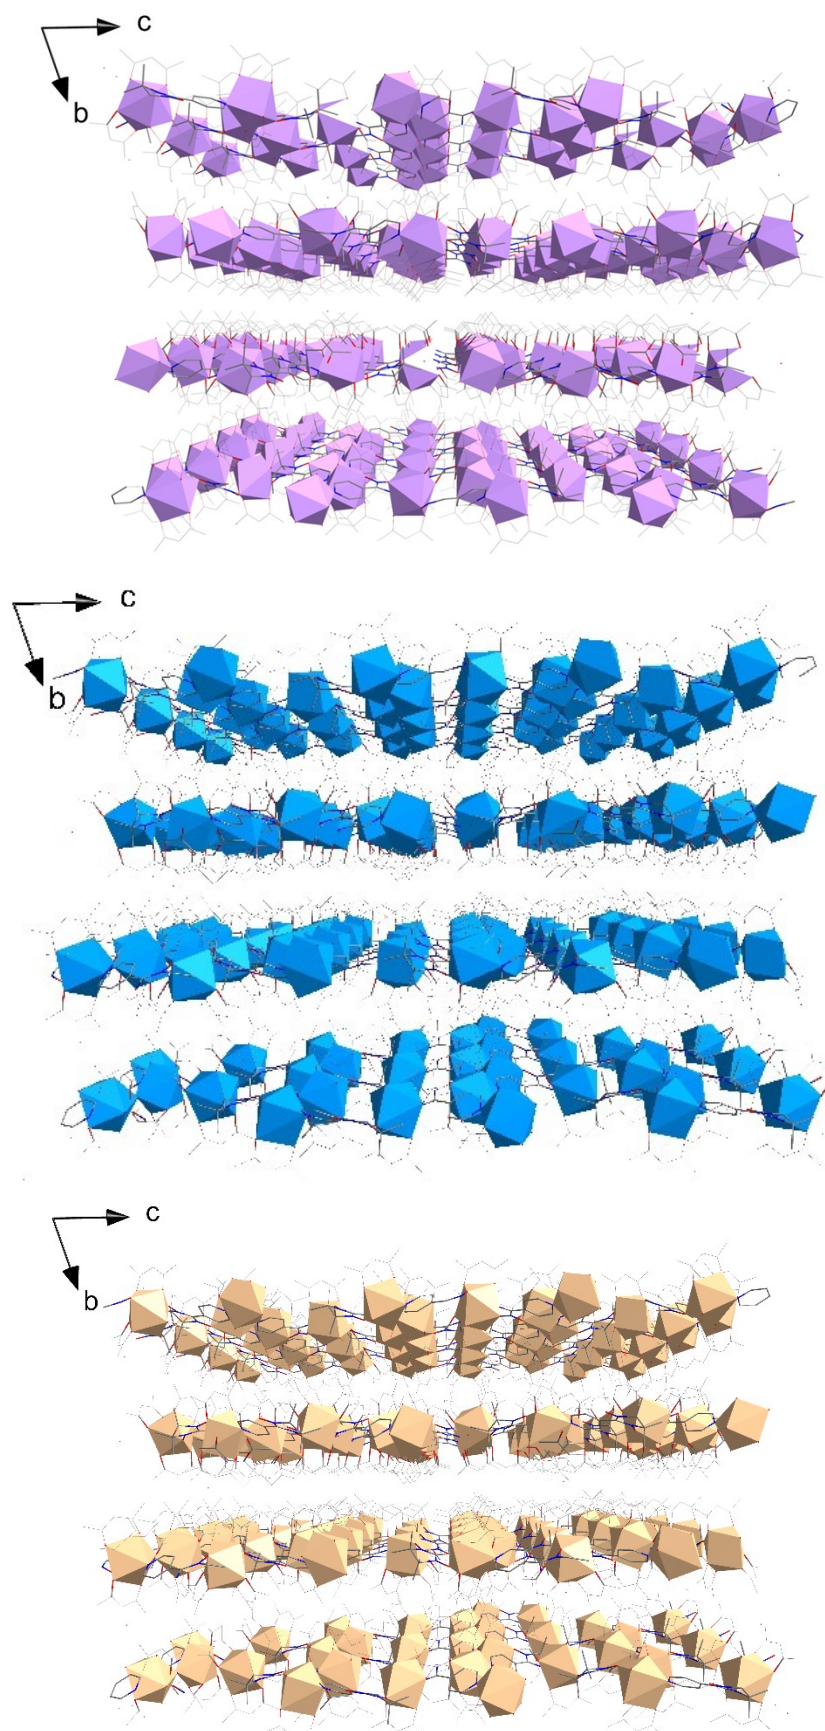

**Figure S5.** Packing patterns of 2D networks of complexes 1-3 (top to bottom for 1-3, respectively).

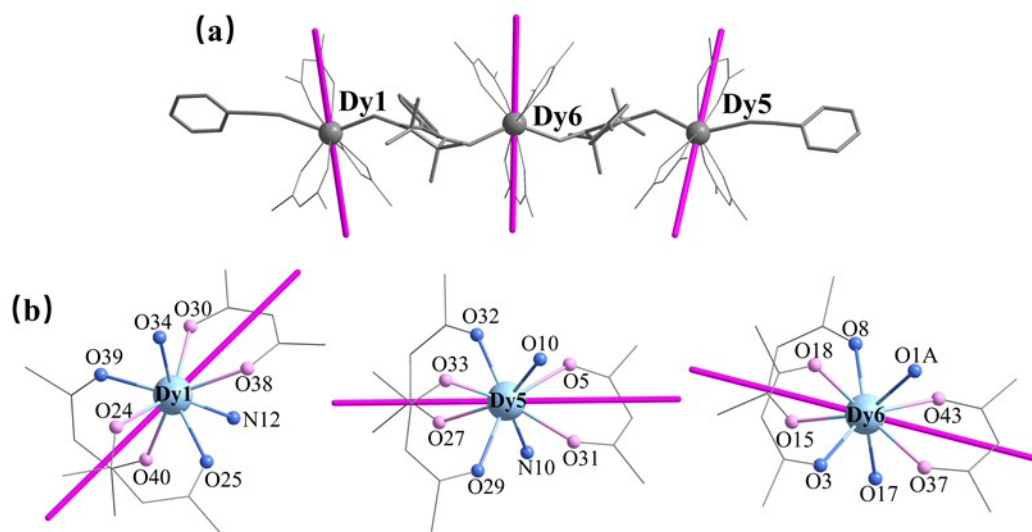

**Figure S6.** (a) Magellan predicted magnetic axes for the Dy1, Dy6 and Dy5 centers in **3**; (b) The orientations of magnetic axes and the coordination atoms in the first spheres of Dy1, Dy6 and Dy5 centers in **3**. (H and F atoms are omitted for clarity).

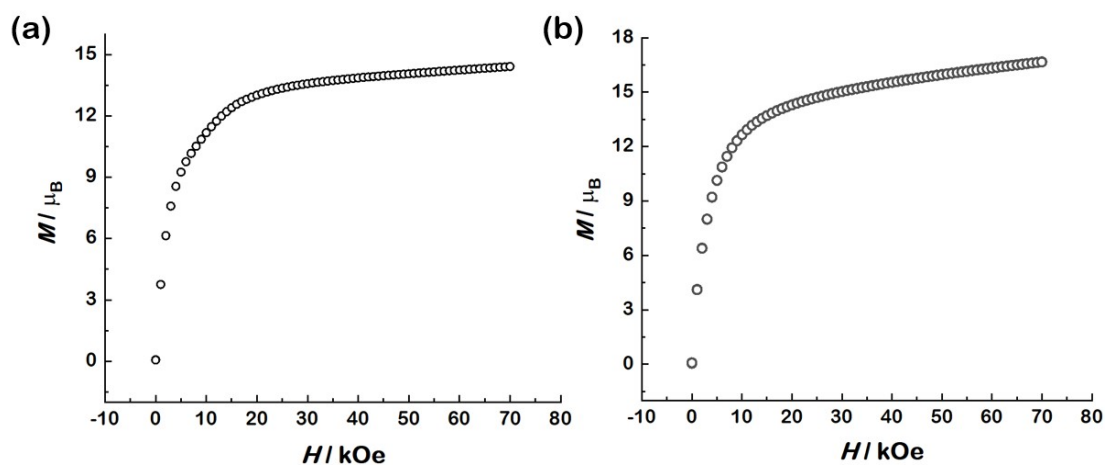

**Figure S7.**  $M$  versus  $H$  plots for (a) **2** and (b) **3** at 2 K.

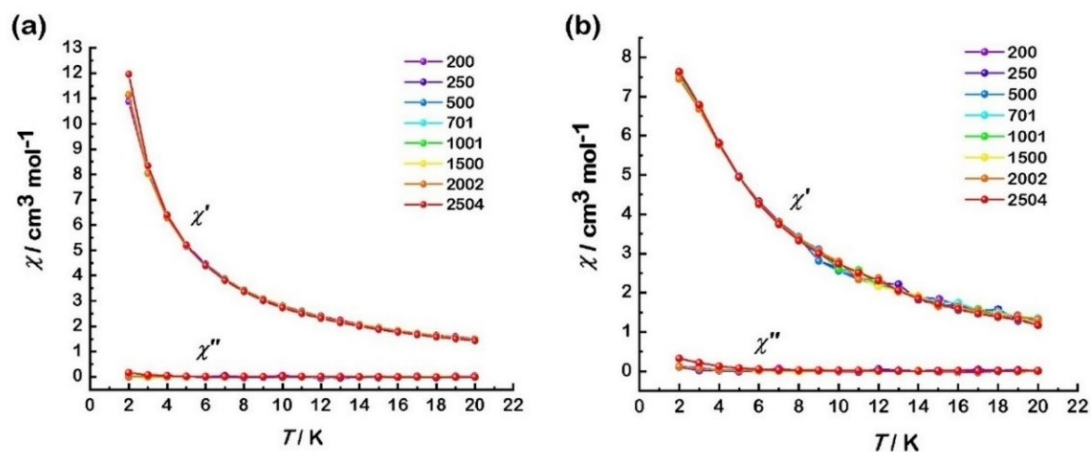

**Figure S8.** Temperature dependence of the ac magnetic susceptibility for **2** under zero dc field (a) and a dc field of 2500Oe (b).

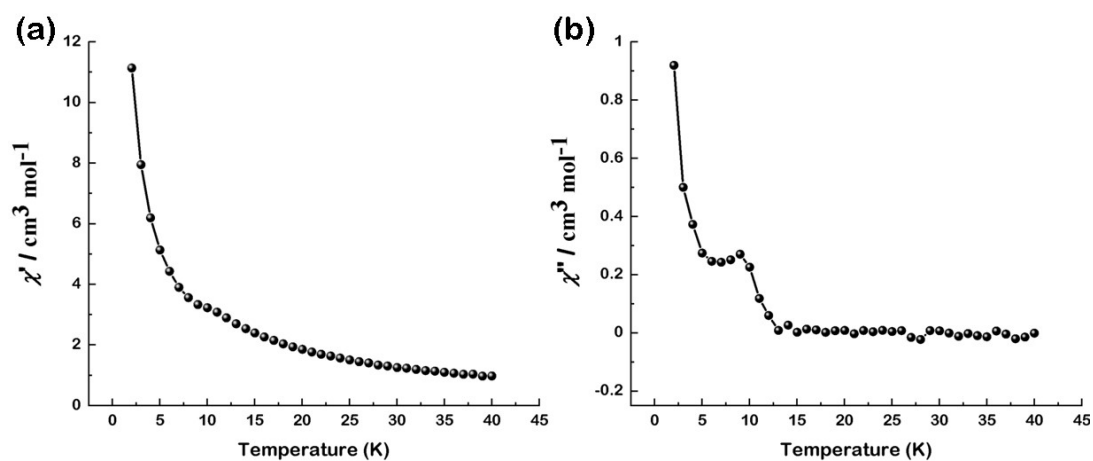

**Figure S9.** Temperature dependences of in-phase ( $\chi'_{\text{M}}$ ) (a) and out-of-phase ( $\chi''_{\text{M}}$ ) (b) magnetic susceptibility for **3** in zero dc field with an oscillation of 3 Oe at 997 Hz.
